# Supplementary material for: Pulsed laser deposition of delafossite oxide thin films on YSZ (001) substrates as solar water splitting photocathodes
Source: Royal Society of Chemistry journal article supplement (doi:10.1039/d4en00706a), 2024-11-15
Supplement: d4en00706a1.pdf [file d4en00706a1.pdf]

**Supplementary Material for “Pulsed Laser Deposition of Delafossite Oxide Thin Films on  
YSZ (001) Substrates as Solar Water Splitting Photocathodes”**

Chenyu Zhou<sup>1</sup>, Atiya Banerjee<sup>1</sup>, Esteban Luis Fornero<sup>2</sup>, Zhaoyi Xi<sup>1,3</sup>, Xiao Tong,<sup>1</sup> Eli Stavitski<sup>4</sup>,  
Xiaohui Qu<sup>1</sup>, Sara E. Mason<sup>1</sup>, Dario J. Stacchiola<sup>1</sup>, Mingzhao Liu<sup>1</sup>

<sup>1</sup>Center for Functional Nanomaterials, Brookhaven National Laboratory, Upton, New York 11973,  
United States

<sup>2</sup>Instituto de Desarrollo Tecnológico para la Industria Química, UNL-CONICET, Güemes 3450,  
3000 Santa Fe, Argentina

<sup>3</sup>Department of Materials Science and Chemical Engineering, Stony Brook University, Stony  
Brook, New York 11794, United States

<sup>4</sup>National Synchrotron Light Source II, Brookhaven National Laboratory, Upton, New York  
11973, United States

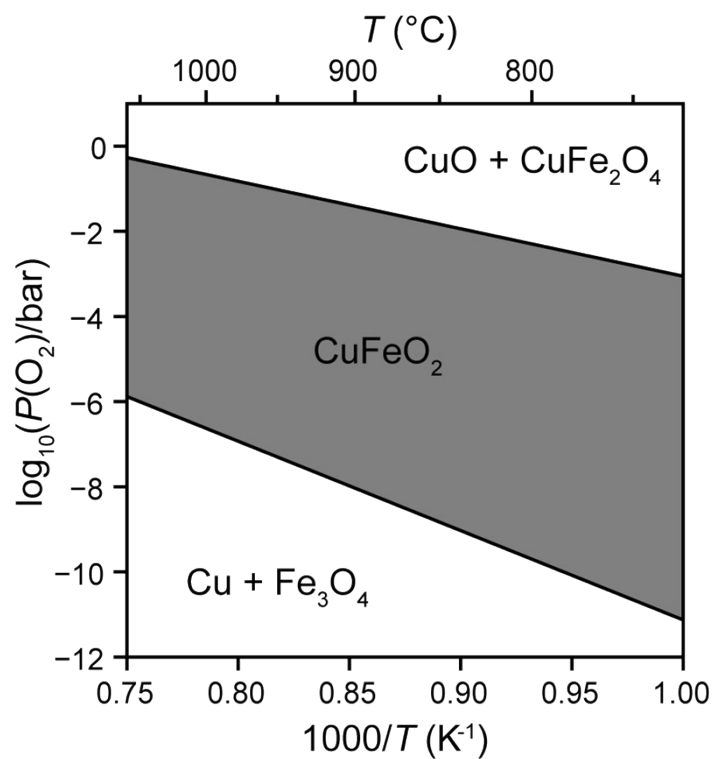

**Figure S1.** Ellingham diagram of the Cu-Fe-O system, recreated using thermodynamics data obtained from Ref. <sup>1</sup>.

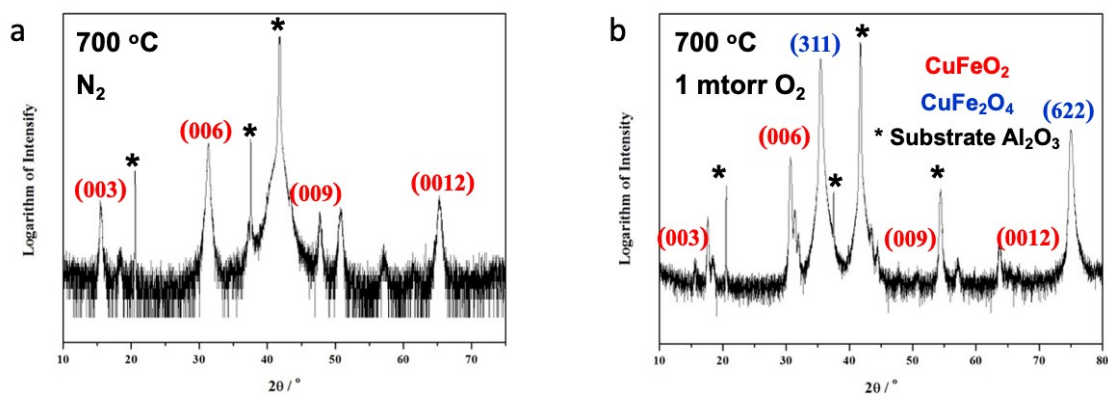

**Figure S2.** XRD patterns of  $\text{CuFeO}_2/\text{Al}_2\text{O}_3$  (0001) thin films deposited at  $700\text{ }^\circ\text{C}$  in (a) nitrogen and (b) oxygen atmospheres.

## References

1. Stöcker, T.; Moos, R., *Materials* 2018, **11**, 1888.
